# Supplementary material for: A Lot of Action, But Not in the Right Direction: Systematic Review and Content Analysis of Smartphone Applications for the Prevention, Detection, and Management of Cancer
Source: J Med Internet Res. 2013 Dec 23;15(12):e287. doi: 10.2196/jmir.2661 (PMC3875901; doi:10.2196/jmir.2661)
Supplement: Supplementary file 2 [file jmir_v15i12e287_app2.pdf]

Multimedia Appendix 2: Examples of representative iPhone apps from each category

| Category and App Name                                       | Screen Shots                                                                         |
|-------------------------------------------------------------|--------------------------------------------------------------------------------------|
| Awareness<br><i>Pink Ribbon Breast Cancer Wallpaper</i>     | 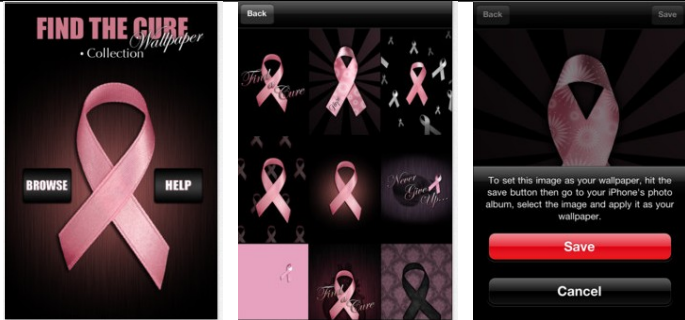   |
| Information<br><i>Cancer iOncolex</i>                       | 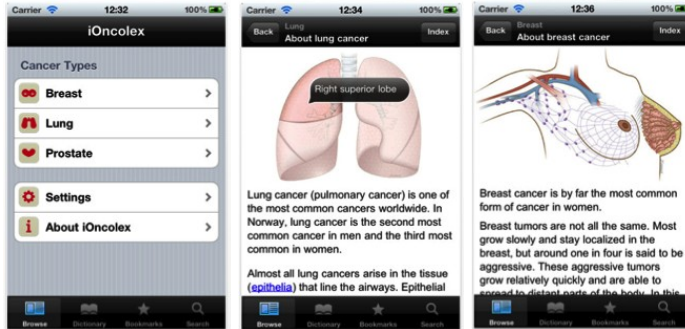   |
| Fundraising<br><i>The Ride to Conquer Cancer</i>            | 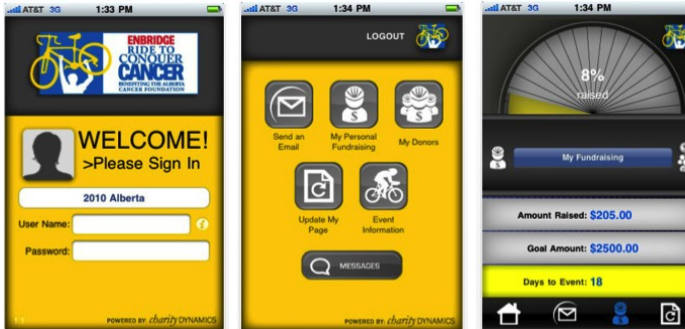  |
| Promote an Organization<br><i>Conquer Cancer Foundation</i> | 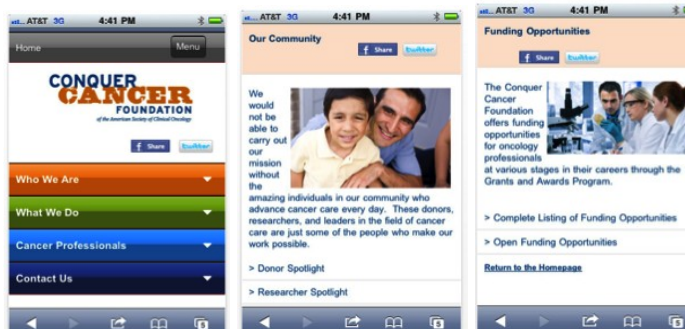 |

|                                                                                                  |                                                                                      |
|--------------------------------------------------------------------------------------------------|--------------------------------------------------------------------------------------|
| <p>Early Detection<br/> <i>Skin Cancer- The Most Accurate Skin Cancer Detector on iPhone</i></p> | 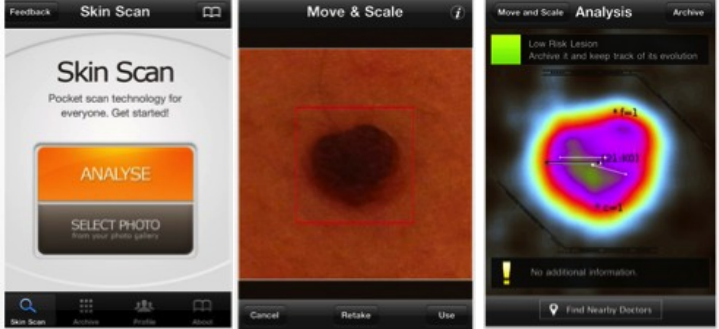   |
| <p>Disease Management<br/> <i>Cancer Net</i></p>                                                 | 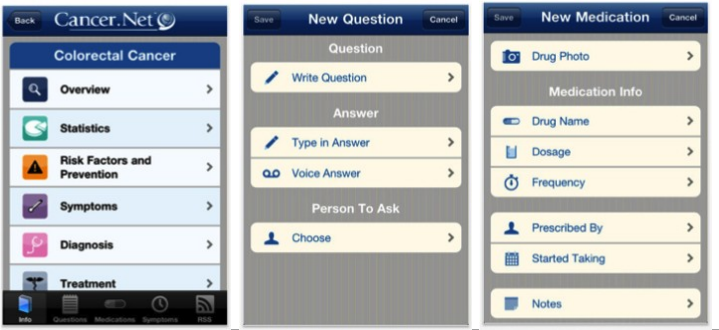   |
| <p>Prevention<br/> <i>iEat for Life: Prostate Cancer</i></p>                                     | 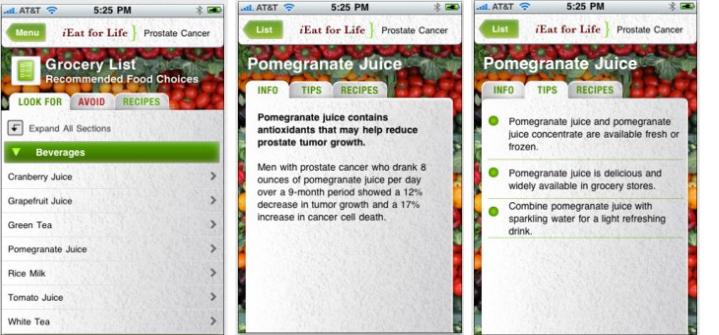  |
| <p>Peer Support<br/> <i>Breast Cancer Connect</i></p>                                            | 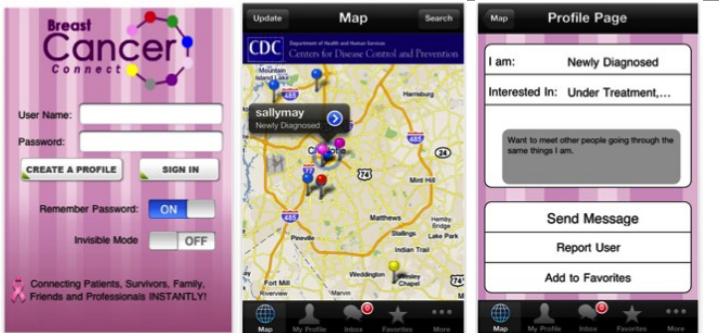 |
